# Supplementary material for: Robust gene coexpression networks using signed distance correlation
Source: PubMed Central journal article supplement (PMC8557847; doi:10.1093/bioinformatics/btab041), 2021-02-01
Supplement: btab041_supplementary_data.pdf [file btab041_supplementary_data.pdf]

## Supplementary Material: Robust gene coexpression networks using signed distance correlation

Javier Pardo-Diaz<sup>1,3,\*</sup>, Lyuba V. Bozhilova<sup>1</sup>, Mariano Beguerisse-Díaz<sup>2</sup>, Philip S. Poole<sup>3</sup>, Charlotte M. Deane<sup>1</sup> and Gesine Reinert<sup>1,†</sup>

<sup>1</sup>Department of Statistics, University of Oxford, Oxford, UK

<sup>2</sup>Mathematical Institute, University of Oxford, Oxford, UK

<sup>3</sup>Department of Plant Sciences, University of Oxford, Oxford, UK

\*[jdiaz@stats.ox.ac.uk](mailto:jdiaz@stats.ox.ac.uk)

†[reinert@stats.ox.ac.uk](mailto:reinert@stats.ox.ac.uk)

### 1 *Rhizobium leguminosarum* expression data

Table S1 provides the details of the gene expression data employed to generate the gene coexpression networks for *R. leguminosarum*. We used 54 different microarrays obtained under 18 conditions (first column). The second column indicates the growth condition of the bacteria; for example, "7 days pea, 1 day PI" stands for inoculation of seven days old pea plant sampled one day post-inoculation. The last column indicates the type of sample, which can be "Free-living" (bacteria grown in liquid culture), "Rhizosphere" (bacteria isolated from the fraction of soil in contact with the plant), or "Bacteroid" (bacteria that have infected the plant and differentiated). This data has been published previously [8, 6, 3] but never analysed jointly.

| Microarrays (channels)                      | Growth condition                   | Type        |
|---------------------------------------------|------------------------------------|-------------|
| kk21 (Cy3), kk41 (Cy5), kk45 (Cy3)          | Succinate NH <sub>4</sub>          | Free-living |
| Jay10 (Cy5), Jay11 (Cy5), Jay12 (Cy3)       | Glucose Glutamate                  | Free-living |
| Jay10 (Cy3), Jay11 (Cy3), Jay12 (Cy5)       | Glucose Aspartate                  | Free-living |
| kk46 (Cy3), kk48 (Cy3), kk50 (Cy3)          | Pyruvate NH <sub>4</sub>           | Free-living |
| Vinoy43 (Cy5), Vinoy44 (Cy5), Vinoy45 (Cy3) | Pyruvate NH <sub>4</sub> Hespertin | Free-living |
| Ade7 (Cy3), Ade9 (Cy3), Ade18 (Cy5)         | Pyruvate NH <sub>4</sub> IAA       | Free-living |
| Ade8 (Cy5), Ade11 (Cy3), Ade15 (Cy5)        | Pyruvate NH <sub>4</sub> Kinetin   | Free-living |
| kk39 (Cy5), kk43 (Cy5), kk51 (Cy3)          | Inositol NH <sub>4</sub>           | Free-living |
| Vinoy26 (Cy5), Vinoy31 (Cy5), Vinoy34 (Cy3) | 7 days pea, 1 day PI               | Rhizosphere |
| Vinoy27 (Cy5), Vinoy32 (Cy5), Vinoy35 (Cy3) | 7 days pea, 3 day PI               | Rhizosphere |
| Vinoy28 (Cy5), Vinoy33 (Cy5), Vinoy36 (Cy3) | 7 days pea, 7 day PI               | Rhizosphere |
| Vinoy29 (Cy5), Vinoy37 (Cy5), Vinoy39 (Cy3) | 14 days pea, 1 day PI              | Rhizosphere |
| Vinoy30 (Cy5), Vinoy38 (Cy5), Vinoy40 (Cy3) | 21 days pea, 1 day PI              | Rhizosphere |
| kk67 (Cy5), kk71 (Cy3), kk72 (Cy5)          | 1 week pea, 7 days PI              | Bacteroid   |
| kk65 (Cy5), kk68 (Cy3), kk69 (Cy3)          | 1 week pea, 15 days PI             | Bacteroid   |
| kk73 (Cy5), kk74 (Cy3), kk75 (Cy5)          | 1 week pea, 21 days PI             | Bacteroid   |
| kk64 (Cy5), Vinoy22 (Cy3), Vinoy24 (Cy3)    | 1 week pea, 28 days PI             | Bacteroid   |
| kk70 (Cy5), kk60 (Cy3), kk61 (Cy5)          | Vetch seed, 28 days PI             | Bacteroid   |

Table 1: *Rhizobium leguminosarum* gene expression data description

## 2 Spearman correlation networks for *R. leguminosarum*

We construct a Spearman correlation matrix  $R$  from the pre-processed gene expression matrix  $M^*$  by computing the Spearman correlation between every pair of gene expression vectors. We threshold  $R$  to construct two networks  $NR(d_S)$  and  $NR(d_P)$  with edge density  $d_S$  and  $d_P$ , respectively. Similarly to the networks obtained using Pearson correlation  $NP(d_S)$  and  $NP(d_P)$ , the ones based on Spearman correlation have a larger and less densely connected largest connected component than  $NS(d_S)$  and  $NS(d_P)$ . The summaries of these two networks can be found in Table S2. We evaluate the Spearman networks using STRING as described in the paper. The results obtained are higher than the obtained by the Pearson correlation networks but lower than those using signed distance correlation. Table S3 and Figure S1 show the results of the STRING evaluation for the Spearman networks.

| Network   | Number of Edges | Number of vertices in LCC | Edge density LCC * 100 | Global clustering coeff. LCC |
|-----------|-----------------|---------------------------|------------------------|------------------------------|
| $NR(d_S)$ | 313,348         | 6,664                     | 1.41                   | 0.515                        |
| $NR(d_P)$ | 406,977         | 6,831                     | 1.34                   | 0.515                        |

Table 2: Summaries of Spearman networks for *R. leguminosarum*  
LCC Denotes largest connected component.

| Network   | All of STRING information ( $C$ ) | Only coexpression information ( $C^\dagger$ ) | All information except coexpression ( $C^\ddagger$ ) |
|-----------|-----------------------------------|-----------------------------------------------|------------------------------------------------------|
| $NR(d_S)$ | 28.52                             | 8.67                                          | 25.51                                                |
| $NR(d_P)$ | 25.77                             | 7.38                                          | 23.15                                                |

Table 3: Evaluation of the biological content of the Spearman networks with STRING

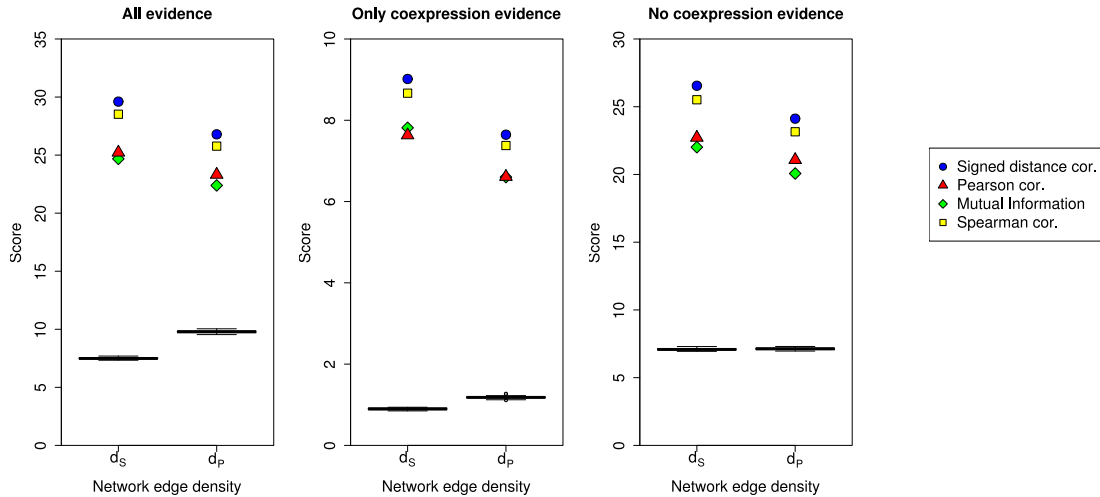

Figure 1: Scores obtained for the *R. leguminosarum* gene coexpression networks using STRING. All panels show the score for the different networks in the y-axis, and the network density on the x-axis. The scores are the result of adding up the confidence scores with all evidence ( $C$ ), only coexpression evidence ( $C^\dagger$ ) and everything excluding coexpression ( $C^\ddagger$ ) from STRING associated with the edges in the networks, each computed using different of information. The black box plots correspond to the scores obtained by 30 random networks. Blue circles, red triangles and yellow squares represent signed distance correlation, Pearson correlation and Spearman correlation, respectively.

### 3 Gene coexpression network analysis for the study of Yeast RNA-Seq data

We use our signed correlation pipeline to generate a gene coexpression network from a dataset obtained using RNA-Seq of yeast (*Saccharomyces cerevisiae*) expressing pathways designed to increase ATP or GTP consumption. We obtain all the raw-counts for experiment E-MTAB-5174 in Expression Atlas [5] and remove the genes with zero expression variance. The final dataset which we feed into our pipeline includes the expression of 6,930 genes across 209 samples.

Following the pipeline described in the methodology section, we pre-process the data and obtain the distance correlation matrix  $D$ , the Pearson correlation matrix  $P$ , the signed correlation matrix  $S$ , and the matrix  $|P|$  of absolute values of the Pearson correlation. Table S4 and Figure S2 show the summaries and distribution of these matrices.

| Correlation matrix | Min   | 1st q | Median | 3rd q | Max  | Mean |
|--------------------|-------|-------|--------|-------|------|------|
| $D$                | 0.00  | 0.26  | 0.40   | 0.57  | 1.00 | 0.42 |
| $ P $              | 0.00  | 0.13  | 0.30   | 0.51  | 1.00 | 0.34 |
| $P$                | -0.96 | -0.29 | 0.00   | 0.31  | 1.00 | 0.01 |
| $S$                | -0.97 | -0.39 | -0.05  | 0.40  | 1.00 | 0.01 |

Table 4: Summaries for the correlation matrices of the Yeast dataset

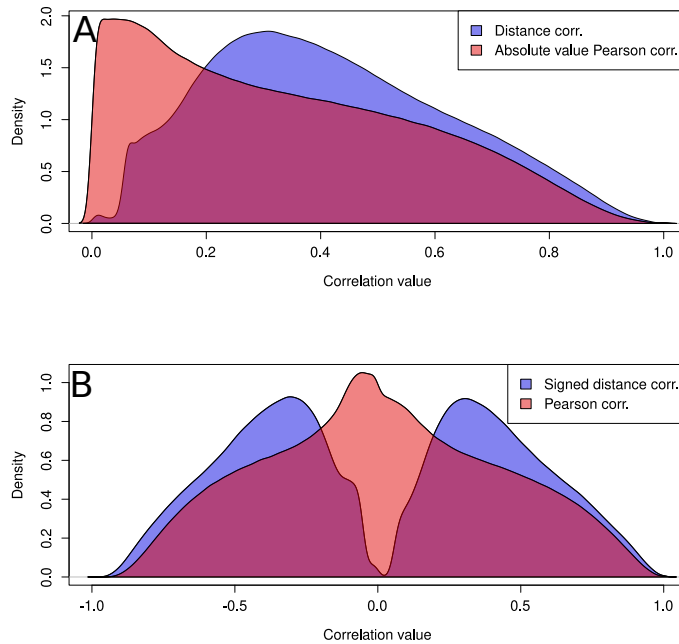

Figure 2: Density plots of the distribution of the values of the correlation matrices from the Yeast dataset. Panel A shows the distribution of values in the distance correlation matrix (blue) and of the absolute value of the values in the Pearson correlation matrix (red). Panel B shows the distribution of values in the signed distance correlation matrix (blue) and of the values in the Pearson correlation matrix (red).

We estimate the optimal threshold values  $\theta^*$ ,  $\theta^*$ , and  $\theta^\circ$  to construct the unweighted gene coexpression networks  $A_S(\theta^*)$ ,  $A_P(\theta^*)$ , and  $A_I(\theta^\circ)$  using COGENT [2]. We follow our pipeline to calculate the self-consistency of the networks. We adjust the similarity score by subtracting the network density. Fig S3 shows the variation of the score function for the correlation matrices across different edge densities. For the three matrices, there is a edge density value for which the score function reaches its maximum. This value is  $d_S = 0.0131$  for the signed distance correlation (score of 0.746, which is achieved for  $\theta^* = 0.84$ ),  $d_P = 0.0146$  for the Pearson correlation (score of 0.733, which is achieved for  $\theta^* = 0.81$ ), and  $d_I = 0.024$  for Mutual Information (score of 0.381, which is achieved for  $\theta^\circ = 1.04$ ). The results show that the use of signed distance correlation offers more stable networks. As in the study of *R. leguminosarum*, the scores obtained using signed mutual information are lower than those retrieved using the correlation methods. However, the difference between the Pearson correlation and signed distance correlation methods is lower than the observed in the study of *R. leguminosarum*. We analyse the networks  $NS(d_S)$  (edge density  $d_S$ ),  $NS(d_P)$  (edge density  $d_P$ ), and  $NS(d_I)$  (edge density  $d_I$ ) retrieved from  $S$ , the networks  $NP(d_S)$  (edge density  $d_S$ ),  $NP(d_P)$  (edge density  $d_P$ ) and  $NP(d_I)$  (edge density  $d_I$ ) retrieved from  $P$ , the networks  $NI(d_S)$  (edge density  $d_S$ ),  $NI(d_P)$  (edge density  $d_P$ ), and  $NI(d_I)$  (edge density  $d_I$ ) retrieved from  $I$ , and the networks  $NR(d_S)$  (edge density  $d_S$ ),  $NR(d_P)$  (edge density  $d_P$ ), and  $NR(d_I)$  (edge density  $d_I$ ) obtained using Spearman correlation. The summaries of the 12 networks are detailed in Table S5.

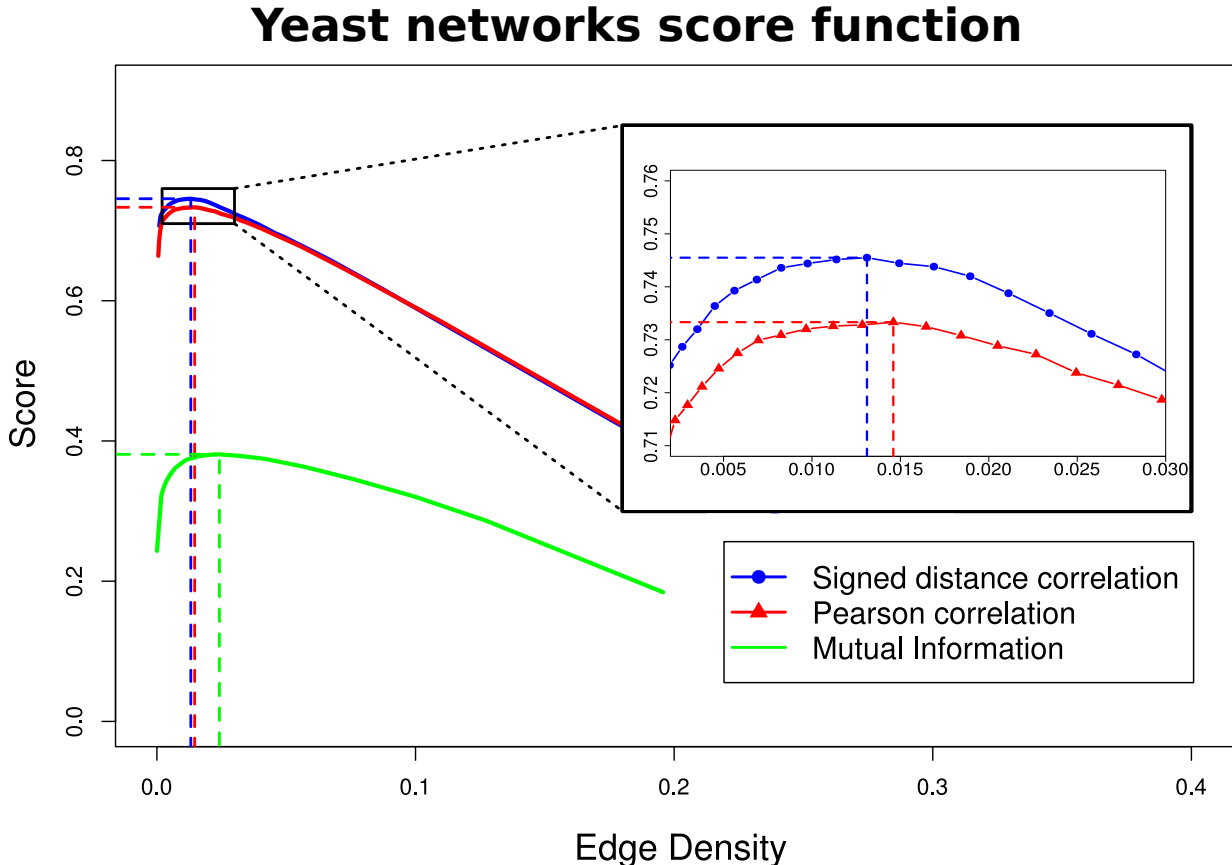

Figure 3: Score function values for different edge densities using the Yeast dataset. The blue line with circles shows the scores obtained using signed distance correlation and the red line with triangles those obtained using Pearson correlation. The green line those obtained using mutual information. The dotted lines indicate the position of the highest score point for each line. This value is 0.746 for the signed distance correlation network (giving edge density 0.0131 which is achieved with  $\theta^* = 0.84$ ), 0.733 for the Pearson correlation network (giving edge density 0.0146 which is achieved with  $\theta^* = 0.81$ ) and 0.381 for the mutual information network (giving edge density 0.024 which is achieved with  $\theta^\circ = 1.04$ ).

We evaluate all the networks using STRING [9]. We use the three different sets of confidence scores:

| Network   | Number of Edges | Number of vertices in LCC | Edge density LCC * 100 | Global clustering coeff. LCC |
|-----------|-----------------|---------------------------|------------------------|------------------------------|
| $NS(d_S)$ | 314,771         | 3,987                     | 3.91                   | 0.651                        |
| $NS(d_P)$ | 350,549         | 4,154                     | 4.02                   | 0.607                        |
| $NS(d_I)$ | 580,360         | 4,954                     | 4.73                   | 0.715                        |
| $NP(d_S)$ | 314,771         | 4,497                     | 3.07                   | 0.431                        |
| $NP(d_P)$ | 350,549         | 4,615                     | 3.25                   | 0.516                        |
| $NP(d_I)$ | 580,360         | 5,334                     | 4.08                   | 0.644                        |
| $NI(d_S)$ | 314,771         | 4,001                     | 3.93                   | 0.411                        |
| $NI(d_P)$ | 350,549         | 4,085                     | 4.20                   | 0.46                         |
| $NI(d_I)$ | 580,360         | 4,424                     | 5.93                   | 0.44                         |
| $NR(d_S)$ | 314,771         | 5,060                     | 2.39                   | 0.578                        |
| $NR(d_P)$ | 350,549         | 5,117                     | 2.44                   | 0.578                        |
| $NR(d_I)$ | 580,361         | 5,432                     | 3.92                   | 0.594                        |

Table 5: Summaries of yeast networks. LCC denotes largest connected component.

obtained using all the evidence in STRING ( $C$ ), obtained using only coexpression information ( $C^\dagger$ ), and obtained using all the evidence except the coexpression information ( $C^\ddagger$ ). Table S6 and Figure S4 present the results. For all the studied cases, the results obtained using the signed distance correlation networks are the highest. Unlike with the *R. leguminosarum* dataset, the Pearson correlation networks perform better than the Spearman correlation networks and the mutual information networks. In fact, the results for the signed distance correlation and Pearson correlation are almost identical (as in the case of the self-consistency study). These results reinforces our hypothesis that a high similarity in the self-consistency of the networks may imply a similarity in the amount of biological information that the networks are able to capture.

We generate 90 random networks of which 30 have edge density  $d_S$ , 30 have edge density  $d_P$  and other 30 have edge density  $d_I$ . We evaluate these networks with the STRING information and find that the all the networks in Table S5 outperform all of them. The highest difference to random is obtained for signed distance correlation networks when using only coexpression information ( $C^\dagger$ ) to evaluate the networks; for  $NS(d_S)$  the score is 17.69 times higher than the mean score obtained by random networks with matching densities.

| Network   | All of STRING information ( $C$ ) | Only coexpression information ( $C^\dagger$ ) | All information except coexpression ( $C^\ddagger$ ) |
|-----------|-----------------------------------|-----------------------------------------------|------------------------------------------------------|
| $NS(d_S)$ | <b>117.36</b>                     | <b>85.03</b>                                  | <b>67.14</b>                                         |
| $NP(d_S)$ | 116.31                            | 84.85                                         | 66.3                                                 |
| $NI(d_S)$ | 68.31                             | 45.70                                         | 41.67                                                |
| $NR(d_S)$ | 74.84                             | 48.11                                         | 50.48                                                |
| RE $d_S$  | 14.02±0.14                        | 4.81±0.08                                     | 11.89±0.12                                           |
| $NS(d_P)$ | <b>111.29</b>                     | <b>79.69</b>                                  | <b>64.59</b>                                         |
| $NP(d_P)$ | 110.14                            | 79.37                                         | 63.64                                                |
| $NI(d_P)$ | 66.36                             | 44.15                                         | 40.72                                                |
| $NR(d_P)$ | 72.45                             | 46.05                                         | 49.19                                                |
| RE $d_P$  | 14.02±0.14                        | 4.79±0.07                                     | 11.91±0.13                                           |
| $NS(d_I)$ | <b>86.65</b>                      | <b>58.62</b>                                  | <b>53.34</b>                                         |
| $NP(d_I)$ | 85.56                             | 57.94                                         | 52.60                                                |
| $NI(d_I)$ | 58.30                             | 37.37                                         | 36.93                                                |
| $NR(d_I)$ | 62.03                             | 37.67                                         | 43.10                                                |
| RE $d_I$  | 13.98±0.08                        | 4.78±0.04                                     | 11.87±0.08                                           |

Table 6: Evaluation of the biological content of the networks with STRING. RE indicates the expected (mean) result based on random networks with the indicated edge density and its standard deviation.

We conclude that the Yeast gene coexpression networks obtained using signed distance correlation are more stable and recover more biological information than those based on Pearson correlation, mutual information, or Spearman correlation.

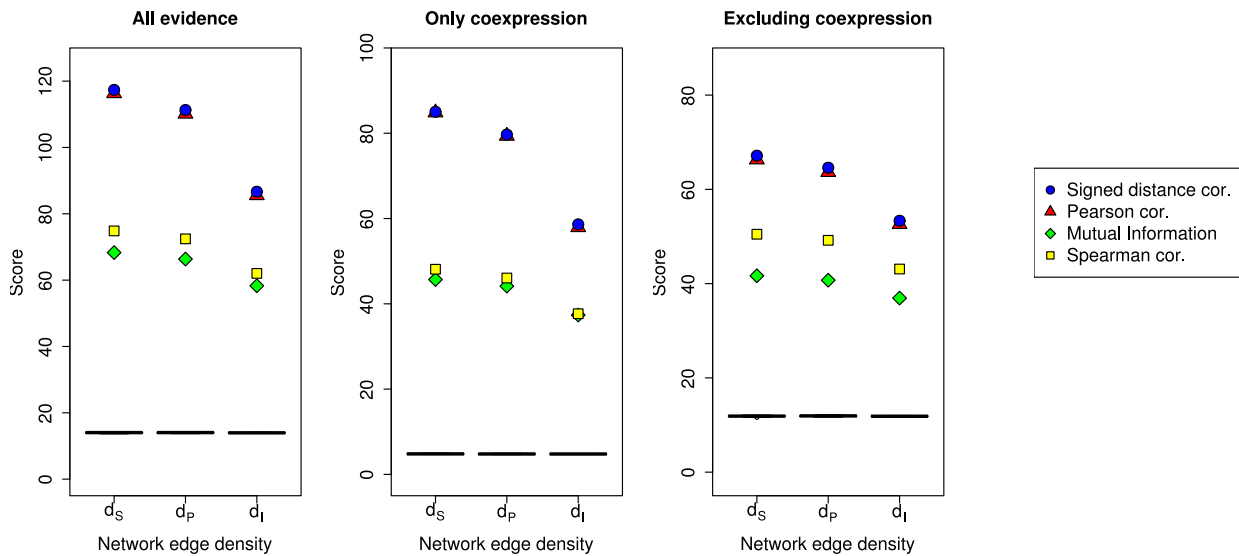

Figure 4: Scores obtained for the yeast gene coexpression networks using STRING. All panels show the score for the different networks in the y-axis, and the network density on the x-axis. The scores are the result of adding up the confidence scores from STRING associated with the edges in the networks. Each plot corresponds to a different set of values: using all evidence  $C$ , only coexpression evidence  $C^\dagger$  and excluding coexpression evidence  $C^\ddagger$ . The black box plots correspond to the scores obtained by 30 random networks. Blue circles, red triangles, green diamonds, and yellow squares represent signed distance correlation, Pearson correlation, mutual information, and Spearman correlation, respectively.

## 4 Gene coexpression network analysis for the study of human liver single-cell RNA-Seq data

We use our signed correlation pipeline to generate a gene coexpression network from a dataset obtained using single-cell RNA-Seq of human liver cells [4]. Most of the methods to study single-cell RNA-Seq data aim to cluster cells according to their levels of gene expression [11, 10]. However, in this section we aim to group genes based on their expression across different samples (or cells, in this context) by constructing a gene coexpression network. Both approaches are complementary and we hope to combine them in the future. The original dataset measures the expression of 15,353 genes in 1,622 cells.

This dataset is considerably different from the previous two, both in the data itself – the measurements correspond to different cells instead of to different samples – and the organism – while both *R. leguminosarum* and *S. cerevisiae* are unicellular organisms, humans are not. Hence, a considerable proportion of genes are not expressed in the studied cells (for example, specific genes in neurons will not be expressed in cells from liver). For this reason, we employ a different pre-processing strategy in this case. In the first place, we quantile-normalise the data [1] to make the measurements in the different cells comparable. Afterwards, as in [7], we identify the “non-changing genes”. These genes are those for which the difference between its highest and lowest expression value (“expression difference”) is lower than the median of all the expression differences calculated for each gene, and in addition for which the mean expression signal between samples is lower than the median of all the expression signals calculated for each gene. After removing the “non-changing genes” we obtain an already quantile-normalised dataset with information for 8,585 genes. We do not apply more preprocessing steps to this dataset (we do not quantile-normalise again the data and we do not set the lowest expressed genes from each sample to the lowest expression value).

We calculate the distance correlation matrix ( $D$ ), the Pearson correlation matrix ( $P$ ), the signed correlation matrix ( $S$ ), and the matrix  $|P|$  of absolute values of the Pearson correlation. Table S7 and Figure S5 show the summaries and distribution of these matrices.

| Correlation matrix | Min   | 1st q | Median | 3rd q | Max  | Mean |
|--------------------|-------|-------|--------|-------|------|------|
| $D$                | 0.00  | 0.03  | 0.04   | 0.05  | 0.88 | 0.04 |
| $ P $              | 0.00  | 0.01  | 0.02   | 0.03  | 0.91 | 0.02 |
| $P$                | -0.63 | -0.02 | 0.00   | 0.02  | 0.91 | 0.00 |
| $S$                | -0.71 | -0.03 | -0.02  | 0.04  | 0.88 | 0.00 |

Table 7: Summaries for the correlation matrices of the single-cell dataset from human liver

We estimate the optimal threshold values  $\theta^*$ ,  $\theta^\star$ , and  $\theta^\diamond$  to construct the unweighted gene coexpression networks  $A_S(\theta^*)$ ,  $A_P(\theta^\star)$ , and  $A_I(\theta^\diamond)$  using COGENT [2]. We follow a similar pipeline as the one employed in the case of *R. leguminosarum* to calculate and adjust the self-consistency of the networks. The only difference is that as the input expression matrix is already quantile-normalised and low expressed genes have already been filtered out, in each of the 25 iterations the pre-processing steps are omitted. Figure S6 shows the variation of the score function for the correlation matrices across different edge densities. For the three tested methods, there is a edge density value for which the score function reaches its maximum. This value is  $d_S = 0.00009$  for signed distance correlation (score of 0.896, which is achieved for  $\theta^* = 0.44$ ),  $d_P = 0.000089$  for Pearson correlation (score of 0.781, which is achieved for  $\theta^\star = 0.43$ ), and  $d_I = 0.00017$  for mutual information (score of 0.63, which is achieved for  $\theta^\diamond = 0.63$ ). The results show that for all tested edge densities, the use of signed distance correlation offers more stable networks. We analyse the networks  $NS(d_S)$  (edge density  $d_S$ ),  $NS(d_P)$  (edge density  $d_P$ ), and  $NS(d_I)$  (edge density  $d_I$ ) retrieved from  $S$ , the networks  $NP(d_S)$  (edge density  $d_S$ ),  $NP(d_P)$  (edge density  $d_P$ ) and  $NP(d_I)$  (edge density  $d_I$ ) retrieved from  $P$ , the networks  $NI(d_S)$  (edge density  $d_S$ ),  $NI(d_P)$  (edge density  $d_P$ ), and  $NI(d_I)$  (edge density  $d_I$ ) retrieved from  $I$ , and the networks  $NR(d_S)$  (edge density  $d_S$ ),  $NR(d_P)$  (edge density  $d_P$ ), and  $NR(d_I)$  (edge density  $d_I$ ) obtained using Spearman correlation. The summaries of all the networks are detailed in Table S8. We note that the largest connected components of the networks contain a lower proportion of

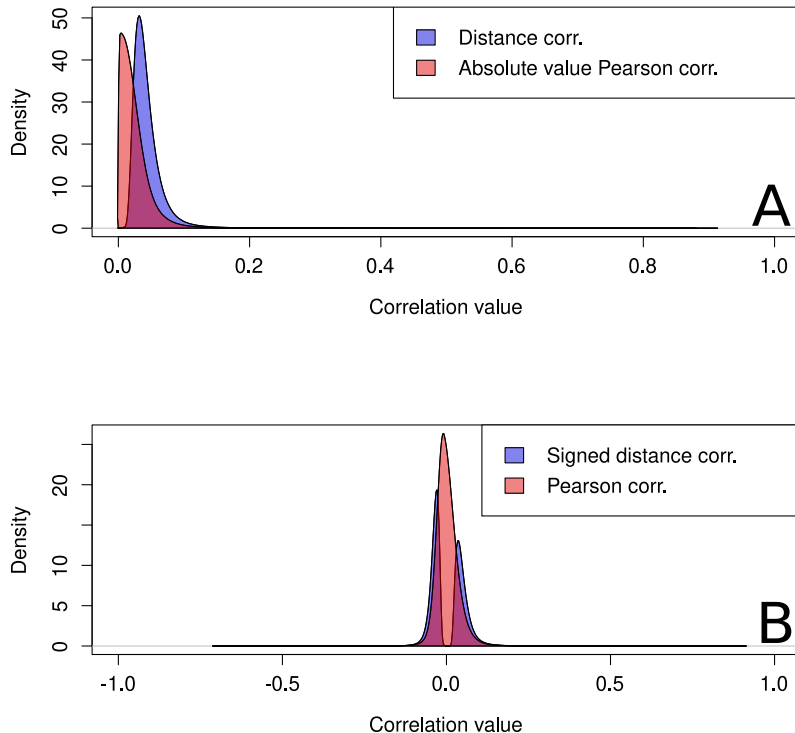

Figure 5: Density plots of the distribution of the values of the correlation matrices from the Yeast dataset. Panel A shows the distribution of values in the distance correlation matrix (blue) and of the absolute value of the values in the Pearson correlation matrix (red). Panel B shows the distribution of values in the signed distance correlation matrix (blue) and of the values in the Pearson correlation matrix (red).

the total vertices than in previous datasets. The networks obtained using signed distance correlation have a smaller and denser largest connected component than those obtained using Pearson correlation. In contrast to the two previous datasets, the largest connected components of the networks obtained using Spearman correlation and mutual information are smaller and denser than those from signed distance correlation and Pearson correlation networks; however, the signed distance correlation networks still have the highest global clustering coefficient. We observe that when increasing the edge density from  $d_S$  to  $d_I$ , the size of the largest connected component in the signed distance correlation networks increases considerably. This change is more subtle for the mutual information network. This finding may be connected with the fact that the optimal edge density for mutual information is higher than for signed distance correlation and Pearson correlation.

Similarly as for the two previous datasets, we evaluate the constructed networks using three sets of confidence values obtained from STRING. We also evaluate 60 random networks with edge densities  $d_S$  (30 networks),  $d_P$  (30 networks), and  $d_I$  (30 networks). Table S9 and Figure S7 show the results. Overall, the networks obtained using signed distance correlation  $NS(d_S)$  and  $NS(d_P)$  retrieve a higher score than their competitors based on either Pearson or Spearman correlation or mutual information. This result suggest that among the assessed methods, signed distance correlation captures the broadest range of biological information, which makes it a tool of choice to generating gene coexpression networks from single-cell RNA-Seq data. All the analysed networks obtain a higher score than the random ones. The highest difference to random is obtained for signed distance correlation networks when using only coexpression information ( $C^\dagger$ ) to evaluate the networks; for  $NS(d_P)$  the score is 92.92 times higher than the mean score obtained by random networks with matching densities; for  $NS(d_S)$  it is even 94.28 than the corresponding mean score for the random networks.

We conclude that the liver gene coexpression networks obtained using signed distance correlation are more stable and show recover more biological information than those based on Pearson correlation and that our signed distance correlation method is suitable for studying single cell gene expression



| Network   | Number of Edges | Number of vertices<br>in LCC | Edge density<br>LCC * 100 | Global clustering<br>coeff. LCC |
|-----------|-----------------|------------------------------|---------------------------|---------------------------------|
| $NS(d_S)$ | 3320            | 212                          | 14.61                     | 0.87                            |
| $NS(d_P)$ | 3279            | 210                          | 14.71                     | 0.87                            |
| $NS(d_I)$ | 6150            | 398                          | 7.69                      | 0.83                            |
| $NP(d_S)$ | 3320            | 219                          | 12.42                     | 0.83                            |
| $NP(d_P)$ | 3279            | 216                          | 12.62                     | 0.83                            |
| $NP(d_I)$ | 6150            | 455                          | 5.13                      | 0.81                            |
| $NI(d_S)$ | 3320            | 204                          | 16.00                     | 0.80                            |
| $NI(d_P)$ | 3279            | 198                          | 16.77                     | 0.81                            |
| $NI(d_I)$ | 6150            | 279                          | 15.84                     | 0.77                            |
| $NR(d_S)$ | 3320            | 161                          | 25.54                     | 0.81                            |
| $NR(d_P)$ | 3279            | 160                          | 25.54                     | 0.81                            |
| $NR(d_I)$ | 6150            | 273                          | 16.45                     | 0.78                            |

Table 8: Summaries of single cell human liver networks.  
LCC denotes largest connected component.

| Network   | All of STRING<br>information ( $C$ ) | Only coexpression<br>information ( $C^\dagger$ ) | All information<br>except coexpression ( $C^\ddagger$ ) |
|-----------|--------------------------------------|--------------------------------------------------|---------------------------------------------------------|
| $NS(d_S)$ | <b>212.02</b>                        | <b>185.35</b>                                    | <b>203.55</b>                                           |
| $NP(d_S)$ | 196.30                               | 169.84                                           | 188.12                                                  |
| $NI(d_S)$ | 189.05                               | 172.79                                           | 184.31                                                  |
| $NR(d_S)$ | 183.07                               | 173.02                                           | 179.42                                                  |
| RE $d_S$  | $6.75 \pm 0.73$                      | $1.97 \pm 0.3$                                   | $5.90 \pm 0.73$                                         |
| $NS(d_P)$ | <b>212.35</b>                        | <b>185.80</b>                                    | <b>204.00</b>                                           |
| $NP(d_P)$ | 196.93                               | 170.86                                           | 188.85                                                  |
| $NI(d_P)$ | 187.68                               | 171.82                                           | 182.96                                                  |
| $NR(d_P)$ | 184.18                               | 174.13                                           | 180.61                                                  |
| RE $d_P$  | $6.82 \pm 0.82$                      | $2.00 \pm 0.32$                                  | $5.98 \pm 0.78$                                         |
| $NS(d_I)$ | <b>176.21</b>                        | <b>144.00</b>                                    | <b>162.72</b>                                           |
| $NP(d_I)$ | 162.60                               | 132.43                                           | 152.03                                                  |
| $NI(d_I)$ | 140.49                               | 121.55                                           | 131.09                                                  |
| $NR(d_I)$ | 146.91                               | 131.03                                           | 136.13                                                  |
| RE $d_I$  | $7.03 \pm 0.91$                      | $2.06 \pm 0.25$                                  | $6.17 \pm 0.86$                                         |

Table 9: Evaluation of the biological content of the networks with STRING. RE indicates the expected (mean) result based on random networks with the indicated edge density and its standard deviation.

# Human liver networks score function

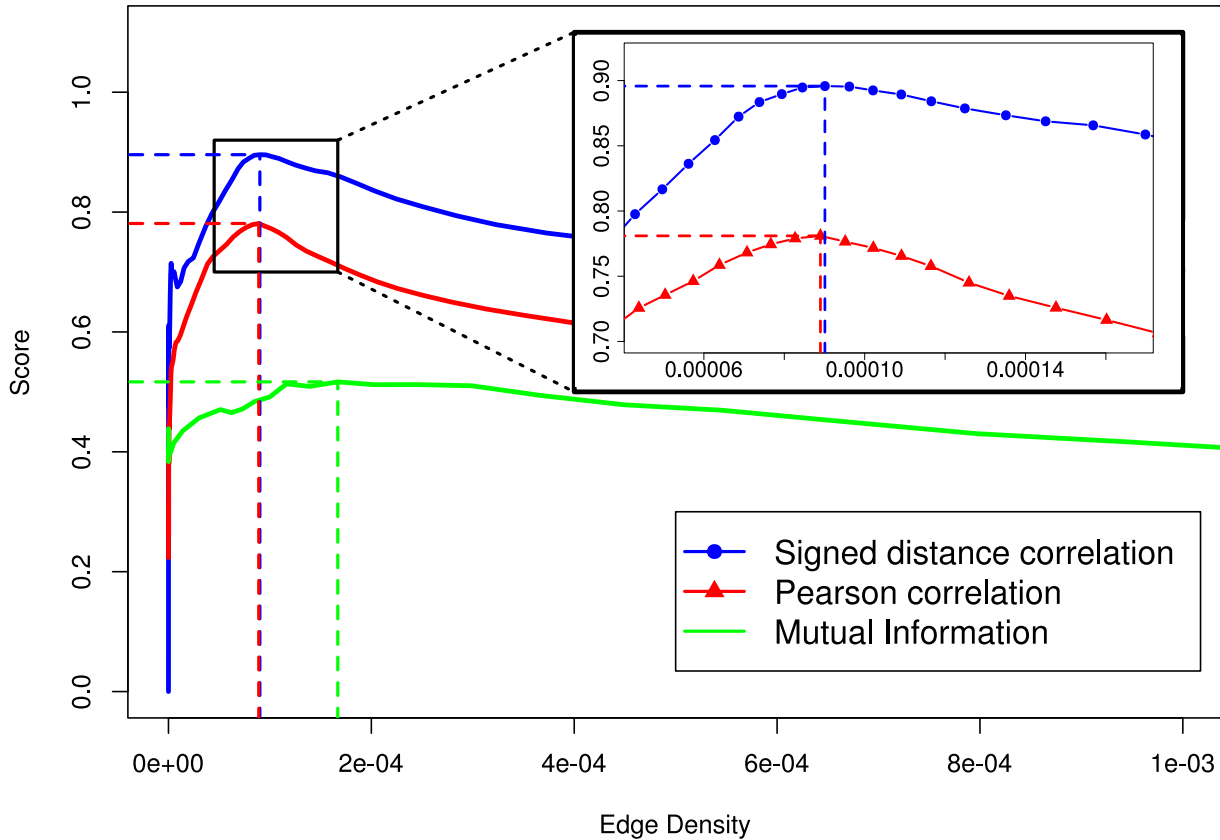

Figure 6: Plot of the score function values for different edge densities using the human liver single-cell RNA-Seq dataset. The blue line shows the scores obtained using signed distance correlation, the red line those obtained using Pearson correlation, and the green line those obtained using mutual information. The dotted lines indicate the position of the highest score point for each line. This value is 0.896 for the signed distance correlation network (giving edge density  $9.01e^{-05}$  which is achieved with  $\theta^* = 0.44$ ), 0.781 for the Pearson correlation network (giving edge density  $8.90e^{-05}$  which is achieved with  $\theta^* = 0.43$ ) and 0.517 for the mutual information network (giving edge density  $1.67e^{-0.4}$ ).

data.

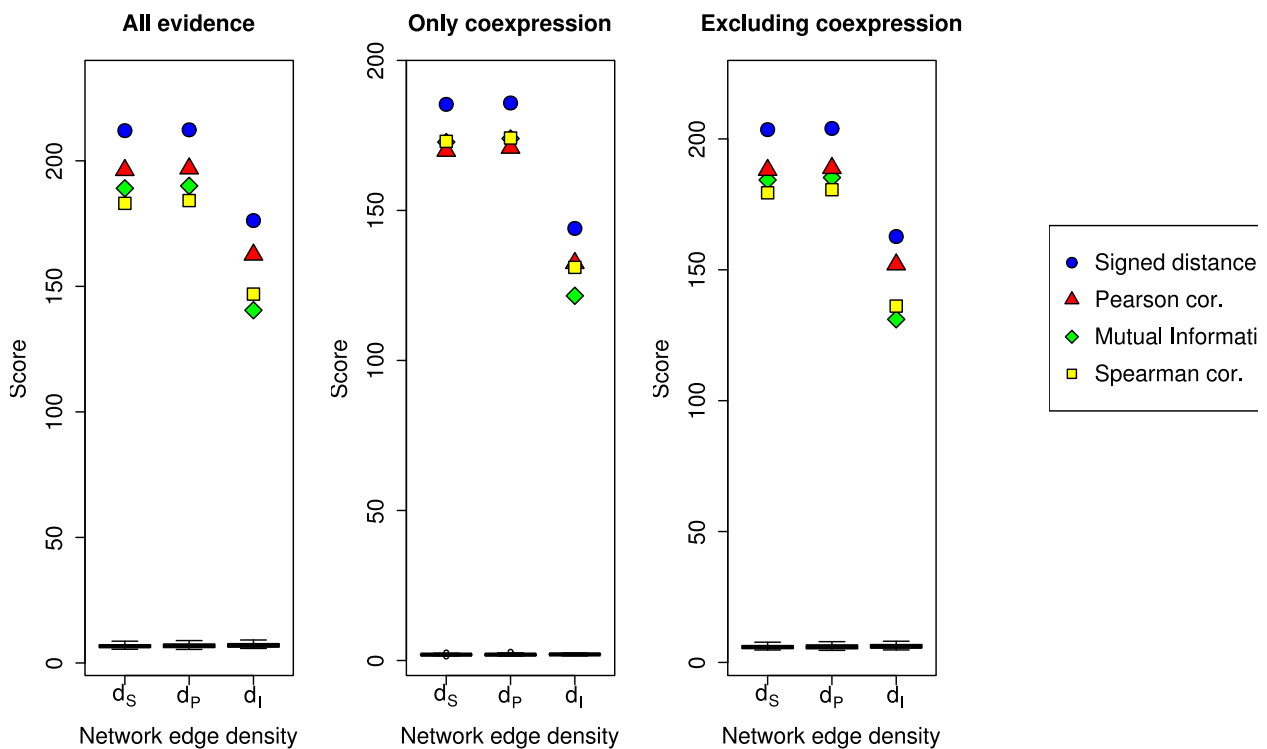

Figure 7: Scores obtained for the single-cell human liver gene coexpression networks using STRING. All panels show the score for the different networks in the y-axis, and the network density on the x-axis. The scores are the result of adding up the confidence scores from STRING associated with the edges in the networks. Each plot corresponds to a different set of values: using all evidence  $C$ , only coexpression evidence  $C^\dagger$  and excluding coexpression evidence  $C^\ddagger$ . The black box plots correspond to the scores obtained by 30 random networks. Blue circles, red triangles and yellow squares represent signed distance correlation, Pearson correlation and Spearman correlation, respectively.

## 5 Network evaluation using information from STRING

We use the interactions between proteins reported in STRING to evaluate the amount of biological information that the constructed networks capture. The association evidence in STRING is categorized into independent channels, weighted, and integrated, resulting in a confidence score for all recorded protein interactions. For each organism, we use three different sets of interactions and confidence scores: the overall confidence score  $C$  provided by STRING, the  $C^\dagger$  obtained attending only to coexpression information, and the  $C^\ddagger$  obtained excluding all coexpression information.

The recomputing of the each of the scores was done using the [python script](#) located on the STRING webpage (Figure 8), which was accessed on the 20<sup>th</sup> of April 2020 using the URL <https://string-db.org/cgi/help.pl?&subpage=faq%23how-are-the-scores-computed>. The script can be found at the end of this section. We commented out lines 96–98, 100–102 in the script to compute the  $C^\dagger$  values; and the line 99 in the script to obtain the  $C^\ddagger$  values.

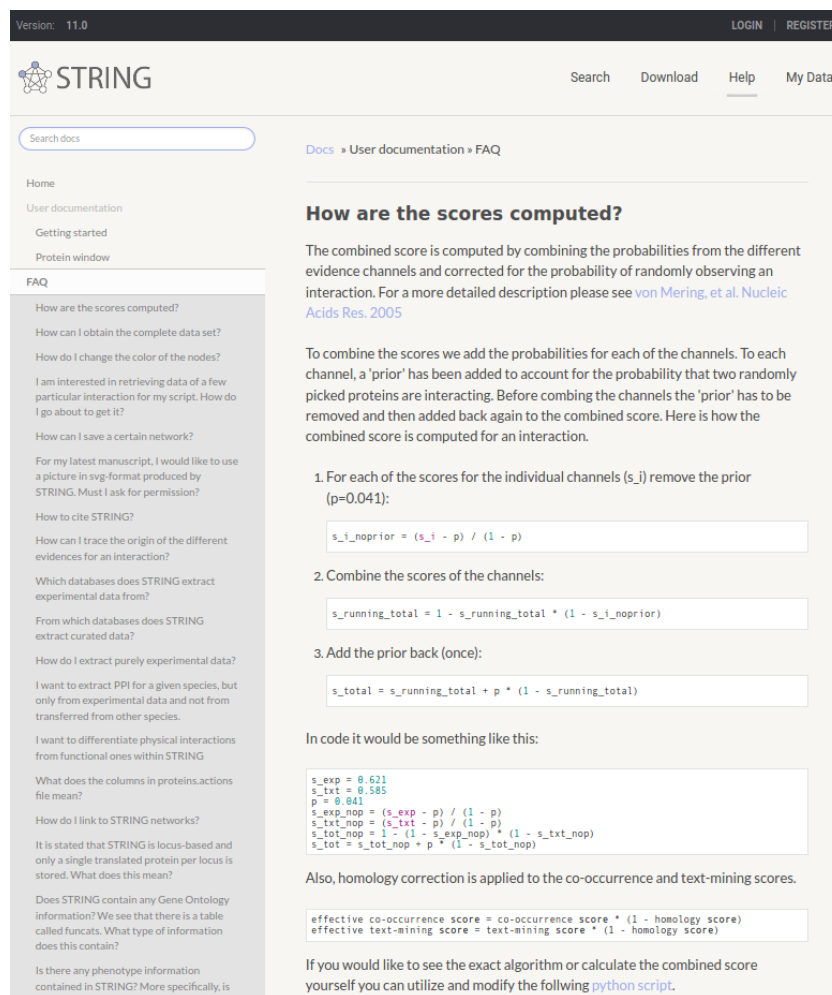

The screenshot shows the STRING website's FAQ page. The main heading is "How are the scores computed?". The text explains that the combined score is calculated by combining probabilities from different evidence channels and correcting for the probability of randomly observing an interaction. It references von Mering et al. (2005). The process is broken down into three steps:

- For each of the scores for the individual channels ( $s_i$ ) remove the prior ( $p=0.041$ ):
$$s_{i\_noprior} = (s_i - p) / (1 - p)$$
- Combine the scores of the channels:
$$s_{running\_total} = 1 - s_{running\_total} * (1 - s_{i\_noprior})$$
- Add the prior back (once):
$$s_{total} = s_{running\_total} + p * (1 - s_{running\_total})$$

Below this, it shows a code snippet for calculating the total score:

```
s_exp = 0.621
s_txt = 0.585
p = 0.041
s_exp_nop = (s_exp - p) / (1 - p)
s_txt_nop = (s_txt - p) / (1 - p)
s_tot_nop = 1 - (1 - s_exp_nop) * (1 - s_txt_nop)
s_tot = s_tot_nop + p * (1 - s_tot_nop)
```

It also notes that homology correction is applied to co-occurrence and text-mining scores, with formulas:

$$\text{effective co-occurrence score} = \text{co-occurrence score} * (1 - \text{homology score})$$
$$\text{effective text-mining score} = \text{text-mining score} * (1 - \text{homology score})$$

The page concludes by offering a link to a python script for those who want to see the exact algorithm or calculate the combined score themselves.

Figure 8: STRING FAQ webpage. Accessed on the 20<sup>th</sup> of April 2020. The content describes how the STRING combines the scores of the different channels. At the end of the section there is the link to the script which was modified and used in this work.

```

1 from __future__ import print_function
2 import os
3 import sys
4
5 #####
6 ## This script combines all the STRING's channels subscores
7 ## into the final combined STRING score.
8 ## It uses unpacked protein.links.full.xx.txt.gz as input
9 ## which can be downloaded from the download subpage:
10 ##     https://string-db.org/cgi/download.pl
11 #####
12
13 input_file = "9606.protein.links.full.v10.5.txt"
14
15 if not os.path.exists(input_file):
16     sys.exit("Can't locate input file %s" % input_file)
17
18 prior = 0.041
19
20 def compute_prior_away(score, prior):
21
22     if score < prior: score = prior
23     score_no_prior = (score - prior) / (1 - prior)
24
25     return score_no_prior
26
27 header = True
28 for line in open(input_file):
29
30     if header:
31         header = False
32         continue
33
34     l = line.split()
35
36     ## load the line
37
38     (protein1, protein2,
39      neighborhood, neighborhood_transferred,
40      fusion, cooccurrence,
41      homology,
42      coexpression, coexpression_transferred,
43      experiments, experiments_transferred,
44      database, database_transferred,
45      textmining, textmining_transferred,
46      initial_combined) = l
47
48     ## divide by 1000
49
50     neighborhood = float(neighborhood) / 1000
51     neighborhood_transferred = float(neighborhood_transferred) / 1000
52     fusion = float(fusion) / 1000
53     cooccurrence = float(cooccurrence) / 1000
54     homology = float(homology) / 1000
55     coexpression = float(coexpression) / 1000
56     coexpression_transferred = float(coexpression_transferred) / 1000
57     experiments = float(experiments) / 1000
58     experiments_transferred = float(experiments_transferred) / 1000
59     database = float(database) / 1000
60     database_transferred = float(database_transferred) / 1000
61     textmining = float(textmining) / 1000
62     textmining_transferred = float(textmining_transferred) / 1000
63     initial_combined = int(initial_combined)
64
65     ## compute prior away
66

```

```

67     neighborhood_prior_corrected = compute_prior_away (neighborhood,
68     prior)
69     neighborhood_transferred_prior_corrected = compute_prior_away (
70     neighborhood_transferred, prior)
71     fusion_prior_corrected = compute_prior_away (fusion, prior)
72     cooccurrence_prior_corrected = compute_prior_away (cooccurrence,
73     prior)
74     coexpression_prior_corrected = compute_prior_away (coexpression,
75     prior)
76     coexpression_transferred_prior_corrected = compute_prior_away (
77     coexpression_transferred, prior)
78     experiments_prior_corrected = compute_prior_away (experiments, prior
79     )
80     experiments_transferred_prior_corrected = compute_prior_away (
81     experiments_transferred, prior)
82     database_prior_corrected = compute_prior_away (database, prior)
83     database_transferred_prior_corrected = compute_prior_away (
84     database_transferred, prior)
85     textmining_prior_corrected = compute_prior_away (textmining, prior)
86     textmining_transferred_prior_corrected = compute_prior_away (
87     textmining_transferred, prior)
88
89     ## then, combine the direct and transferred scores for each category:
90
91     neighborhood_both_prior_corrected = 1.0 - (1.0 - neighborhood_prior_corrected) *
92     (1.0 - neighborhood_transferred_prior_corrected)
93     coexpression_both_prior_corrected = 1.0 - (1.0 - coexpression_prior_corrected) *
94     (1.0 - coexpression_transferred_prior_corrected)
95     experiments_both_prior_corrected = 1.0 - (1.0 - experiments_prior_corrected) *
96     (1.0 - experiments_transferred_prior_corrected)
97     database_both_prior_corrected = 1.0 - (1.0 - database_prior_corrected) * (1.0
98     - database_transferred_prior_corrected)
99     textmining_both_prior_corrected = 1.0 - (1.0 - textmining_prior_corrected) *
100     (1.0 - textmining_transferred_prior_corrected)
101
102     ## now, do the homology correction on cooccurrence and textmining:
103
104     cooccurrence_prior_homology_corrected = cooccurrence_prior_corrected * (1.0 -
105     homology)
106     textmining_both_prior_homology_corrected = textmining_both_prior_corrected * (1.0
107     - homology)
108
109     ## next, do the 1 - multiplication:
110
111     combined_score_one_minus = (
112         (1.0 - neighborhood_both_prior_corrected) *
113         (1.0 - fusion_prior_corrected) *
114         (1.0 - cooccurrence_prior_homology_corrected) *
115         (1.0 - coexpression_both_prior_corrected) *
116         (1.0 - experiments_both_prior_corrected) *
117         (1.0 - database_both_prior_corrected) *
118         (1.0 - textmining_both_prior_homology_corrected) *
119         1)
120
121     ## and lastly, do the 1 - conversion again, and put back the prior *exactly once*
122
123     combined_score = (1.0 - combined_score_one_minus)           ## 1- conversion
124     combined_score *= (1.0 - prior)                             ## scale down
125     combined_score += prior                                     ## and add prior.
126
127     ## round
128
129     combined_score = int(combined_score * 1000)
130     print(protein1, protein2, combined_score)

```

Listing 1: Combine subscores script

## References

- [1] Benjamin M Bolstad, Rafael A Irizarry, Magnus Åstrand, and Terence P. Speed. A comparison of normalization methods for high density oligonucleotide array data based on variance and bias. *Bioinformatics*, 19(2):185–193, 2003.
- [2] Lyuba V Bozhilova, Javier Pardo-Diaz, Gesine Reinert, and Charlotte M Deane. COGENT: evaluating the consistency of gene co-expression networks. *bioRxiv*, 2020.
- [3] R Karunakaran, V K Ramachandran, J C Seaman, A K East, B Mouhsine, T H Mauchline, J Prell, A Skeffington, and P S Poole. Transcriptomic analysis of *Rhizobium leguminosarum* biovar *viciae* in symbiosis with host plants *Pisum sativum* and *Vicia cracca*. *Journal of Bacteriology*, 191(12):4002–4014, 2009.
- [4] Florian Klimm, Enrique M Toledo, Thomas Monfeuga, Fang Zhang, Charlotte M Deane, and Gesine Reinert. Functional module detection through integration of single-cell rna sequencing data with protein–protein interaction networks. *bioRxiv*, page 698647, 2019.
- [5] Robert Petryszak, Maria Keays, Y Amy Tang, Nuno A Fonseca, Elisabet Barrera, Tony Burdett, Anja Füllgrabe, Alfonso Munoz-Pomer Fuentes, Simon Jupp, Satu Koskinen, et al. Expression atlas update—an integrated database of gene and protein expression in humans, animals and plants. *Nucleic Acids Research*, 44(D1):D746–D752, 2016.
- [6] Francesco Pini, Alison K East, Corinne Appia-Ayme, Jakub Tomek, Ramakrishnan Karunakaran, Marcela Mendoza-Suarez, Anne Edwards, Jason Terpolilli, Joshua Rowoth, J Allan Downie, et al. Lux bacterial biosensors for in vivo spatiotemporal mapping of root secretion. *Plant Physiology*, pages pp–01302, 2017.
- [7] Carlos Prieto, Alberto Risueño, Celia Fontanillo, and Javier De Las Rivas. Human gene co-expression landscape: confident network derived from tissue transcriptomic profiles. *PloS One*, 3(12):e3911, 2008.
- [8] Vinoy K Ramachandran, Alison K East, Ramakrishnan Karunakaran, J Allan Downie, and Philip S Poole. Adaptation of *Rhizobium leguminosarum* to pea, alfalfa and sugar beet rhizospheres investigated by comparative transcriptomics. *Genome Biology*, 12(10):R106, 2011.
- [9] Damian Szklarczyk, Annika L Gable, David Lyon, Alexander Junge, Stefan Wyder, Jaime Huerta-Cepas, Milan Simonovic, Nadezhda T Doncheva, John H Morris, Peer Bork, et al. STRING v11: protein–protein association networks with increased coverage, supporting functional discovery in genome-wide experimental datasets. *Nucleic Acids Research*, 47(D1):D607–D613, 2019.
- [10] Daniel E Wagner, Caleb Weinreb, Zach M Collins, James A Briggs, Sean G Megason, and Allon M Klein. Single-cell mapping of gene expression landscapes and lineage in the zebrafish embryo. *Science*, 360(6392):981–987, 2018.
- [11] Caleb Weinreb, Samuel Wolock, and Allon M Klein. Spring: a kinetic interface for visualizing high dimensional single-cell expression data. *Bioinformatics*, 34(7):1246–1248, 2018.
